# Supplementary material for: A multicellular way of life for a multipartite virus
Source: eLife journal article supplement (doi:10.7554/elife.43599), 2019-03-11
Supplement: supp [file elife-43599-supp-v1.zip]

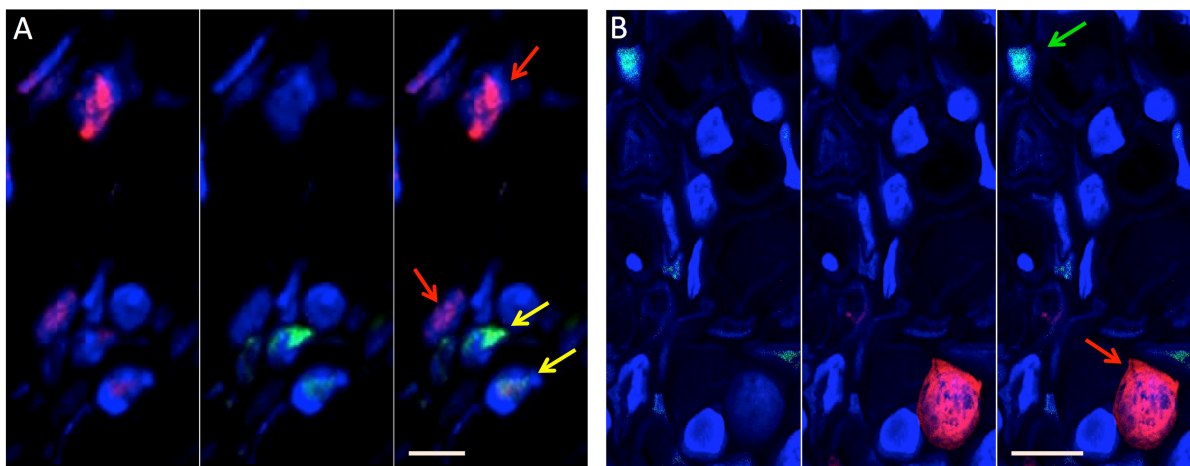

| Petiole  | Marker frequency     | Nb cells / marker content |            |                      |
|----------|----------------------|---------------------------|------------|----------------------|
| 44/45/46 | N-mys2/N-mys7 = 0.67 | N-mys2 = 42               | N-mys7 = 5 | N-mys2 + N-mys7 = 33 |
| 47/48    | N-mys2/N-mys7 = 0.53 | N-mys2 = 10               | N-mys7 = 1 | N-mys2 + N-mys7 = 6  |
| 49       | N-mys2/N-mys7 = 0.79 | N-mys2 = 29               | N-mys7 = 7 | N-mys2 + N-mys7 = 6  |
| 50       | S-mys1/S-mys8 = 0.56 | S-mys1 = 5                | S-mys8 = 1 | S-mys1 + S-mys8 = 5  |
| 51       | S-mys1/S-mys8 = 0.13 | S-mys1 = 2                | S-mys8 = 5 | S-mys1 + S-mys8 = 0  |
| 52       | S-mys1/S-mys8 = 0.31 | S-mys1 = 8                | S-mys8 = 1 | S-mys1 + S-mys8 = 0  |
