# Supplementary material for: A multicellular way of life for a multipartite virus
Source: eLife. 2019 Mar 12;8:e43599. doi: 10.7554/eLife.43599 (PMC6414197; doi:10.7554/eLife.43599)
Supplement: Supplementary file 2. [file elife-43599-supp2.xlsx]

## Sheet: Feuil1
Table S4: Quantification of green and red fluorescence in individual cells of infected petioles
Column A refers to the number of cells analyzed within each petiole
Column B to AO indicate the code number of the petiole (Px), the segment labelled (S or R), and the color of the corresponding probe (red or green)
Cell number/petiole number and segment-probe color	P1 R-Red	P1 S-Green	P2 R-Red	P2 S-Green	P3 R-Red	P3 S-Green	P4 R-Red	P4 S-Green	P5 R-Red	P5 S-Green	P7 S-Red	P7 R-Green	P9 S-Red	P9 R-Green	P10 S-Red	P10 R-Green	P11 R-Red	P11 S-Green	P12 S-Red	P12 R-Green	P13 S-Red	P13 R-Green	P14 S-Red	P14 M-Green	P15 S-Red	P15 M-Green	P16 M-Green	P16 R-Red	P18 M-Green	P18 R-Red	P40 R1-Green	P40 R2-Red	P41 R1-Green	P41 R2-Red	P42 R1-Green	P42 R2-Red	P43 R1-Green 1024	P43 R2-Red 1024	P43 R1-Green 512	P43 R2-Red 512
1	1174.66	963.871	354.967	1326.52	189.68	531.05	250.594	2619.1	578.57	367.52	846.49	2389.35	431.155	92.5352	334.278	44.754	70.6863	560.588	33.1702	12.1277	1344.36	295.25	1774.04	204.113	570.627	239.832	1021.67	263.89	1752.99	549.832	3715.79	3644.88	523.678	497.074	1053.11	915.896	1485.65	1080.85	689.973	515.431
2	792.609	1206.48	864.615	289.291	142.21	626.59	207.441	616.607	842.46	170.29	3235.49	1661.79	716.192	1041.83	85.9273	79.8182	71.2564	359.282	32.4091	30.2273	269.65	1295.92	1152.61	605.348	995.228	395.137	174.36	1754.88	1781.03	802.135	2115.33	2095.3	412.012	386.003	1293.44	806.061	788.235	546.261	657.548	483.914
3	452.976	634.807	268.92	908.105	129.74	270.91	367.879	2650.15	453.72	216.22	1749.32	863.75	680.613	439.108	127.444	287.204	2225.13	1994.21	23.8919	24.5676	1488.04	439.13	1501.43	512.195	1165.02	1033.94	1745.82	493.79	1642.54	1082.3	1145.48	1197.64	543.989	532.182	783.277	664.804	995.964	548.816	1092.97	541.704
4	870.443	323.132	706.963	499.88	180.51	632.41	3072.36	217.131	1419.69	294.81	3970.07	3919.35	587.316	159.759	321.475	272.61	460.161	317.464	38.541	14.8197	634.1	949.94	1083.71	602.809	778.312	254.315	542.16	504.78	1953.32	812.091	912.982	982.717	470.386	453.467	1210.58	757.561	1048.53	735.484	997.931	375.649
5	2416.03	2067.54	847.861	1089.04	185.87	287.5	217.735	636.678	546.7	828.16	1626.09	3642.54	722.507	517.552	183.314	387.529	101.473	851.4	46	34.75	763.75	801.69	928.874	593.28	864.207	330.483	1009.45	984.64	2173.65	677.449	1075.82	939.075	633.458	620.07	702.131	460.584	1007.65	1000.03	696.032	269.794
6	493.927	1512.61	638.58	1284.73	345.99	2759.34	290.596	454.52	372.73	169.99	2433.12	1529.77	1046.74	2162.61	349.107	122.2	745.941	556.559	19.125	31.1	966.81	1050.71	1706.54	161.74	1669.56	507.484	2091.87	529.39	2829.42	402.688	614.385	554.335	287.083	238.258	845.502	414.218	685.337	410.552	1505.09	1304
7	270.293	1472.07	305.334	1394.47	140.14	1084	656.062	1407.93	1613.26	670.39	778.48	2618.89	460.833	283.944	534.455	44.0519	1390.41	195.878	93.383	83.0213	1155.53	811.99	1268.24	265.88	935.586	694.103	3023.55	1358.19	3031.6	1145.42	1018.34	797.99	581.168	480.048	1016.52	466.937	1328.28	1119.82	1665.54	1168.88
8	666.35	1992.73	469.959	2100.11	272.17	176.6	836.599	1207.08	784.71	626.34	894.41	454.68	764.185	185.689	234.808	48.2949	458.304	106.286	21.2353	10.0882	635.63	207.83	816.587	481.981	602.849	579.734	1255.5	403.88	1958.43	455.85	717.186	582.734	847.138	761.663	698.558	288.143	1242.83	814.556	1415.07	1068.68
9	2301.3	352.246	245.121	476.601	952.28	241.02	317.915	741.808	866.15	1168.91	388.69	2012.96	172.197	1014.91	502.425	78.8356	767.895	1588.16	27.1778	55.3111	1499.04	189.14	520.774	422.656	903.412	372.978	1526.58	460.91	2551.44	962.628	791.849	628.046	548.154	416.595	885.519	483.488	843.926	514.858	2567.26	1918.99
10	2459.95	1171.06	251.831	689.786	164.99	777.7	764.59	1457.37	2282.16	773.84	2968.89	644.03	320.916	768.505	203.27	86.6622	124.522	379.478	18.7143	35.2857	2576.65	267.49	881.239	290.722	897.031	535.36	689.92	840.07	2610.31	952.629	4072.35	3973.72	1099.8	1025.38	818.002	482.148	990.456	561.467	1512.48	970.354
11	436.237	915.217	314.61	826.397	160.64	422.83	1956.84	878.447	1065.99	1101.56	1250.57	367.88	588.924	498.419	45.8267	141.027	193.31	1329.55	14.875	7.4375	1358.75	193.69	1215.64	195.859	867.177	426.165	1140.95	292.63	3062.18	403.295	3376.33	2940.41	371.908	317.563	880.083	507.605	1785.21	1269.96	891.997	461.404
12	215.078	1394.9	233.128	1156.48	310.46	1092.65	237.381	1846.98	1061.55	1192.43	2514.78	482.86	259	776.609	511.905	165.81	82.3115	706.426	28.9857	7.25714	510.53	491.43	592.87	162.035	1363.04	412.97	161.35	1672.2	3089.7	939.531	387.37	437.029	462.675	391.739	1143.12	1045.84	820.348	509.543	1162.71	473.285
13	262.096	1853.22	766.494	191.26	2868.49	1008.59	243.163	1015.01	808.7	893.79	3101.09	476.69	277.904	147.459	50.4917	253.358	82	388.119	18.566	59.3962	1104.29	678.96	750.153	308.22	686.957	490.939	1371.95	287.49	2049.53	478.458	563.891	471.08	486.867	399.464	486.34	552.363	1038.8	784.211	968.603	825.701
14	255.724	1409.28	620.059	1822.17	323.63	1000.34	344.155	1356.78	415.61	2567.51	884.64	2050.82	635.64	1176.69	394.451	66.3529	735.512	178.659	71.9623	8.84906	1490.07	543.78	354.045	365.537	557.48	221.908	774.16	277.16	2421.35	395.916	419.308	349.691	573.361	513.07	873.963	1026.75	2032.72	1465.49	880.728	591.096
15	1396.62	2324.25	168.623	411.453	433.21	833.71	247.598	1095.5	1471.97	540.48	1271.38	2784.82	369.626	40.9192	316.308	83.9398	161.449	366.663	36.129	10.8065	1165.43	984.94	706.613	297.258	960.337	371.762	498.99	387.29	1405.53	402.463	397.271	485.149	589.667	519.961	1048.81	1644.24	1406.63	788.736	645.015	531.407
16	1332.33	991.77	145.79	285.349	898.42	1535.03	230.268	609.594	1059.88	562.09	1382.08	2927.13	813.42	53.2273	988.639	171.857	72.2549	574.412			1083.85	1825.82	1194.98	521.082	865.736	283.515	193.26	1852.21	2692.32	736.595	2570.9	2610.97	371.335	302.124	1589.37	1448.22	1897.18	1444.29	593.959	397.236
17	685.4	891.963	179.797	434.069	1034	704.17	413.663	175.414	1524.72	741.51	617.03	1199.49	154.842	246.1	564.435	131.435	995.765	66.5			740.88	1114.57	1102.57	391.155	1026.22	312.112	1656.96	270.6	3116.32	1038.94			283.212	281.956	633.44	771.829	638.805	371.648	1796.82	1215.32
18	496.142	676.354	249.398	365.663	544.93	1078.39	310.402	1495.87	645.84	903.66	3578.56	611.19	386.946	92.4626	162.795	536.955	259.702	397.894			722.65	947.93	3200.12	898.391	447.852	191.971	1520.17	371.31	1795.38	1199			614.5	471.78	729.851	1155.02	858.826	375.127	1538.94	964.941
19	1111.7	3155.33			603.66	408.69	339.697	1055.49	1559.25	866.52	941.43	2359.4	1283.47	97.4318	242.938	1095.98	1368.69	244.663			770.84	1017.01	1749.95	488.912	1241.65	330.639	2133.47	638.75	1199	924.484			582.524	480.897	421.309	542.016	797.244	486.237	3003.08	2282.6
20	415.949	824.08			377.36	716.52	330.033	2607.46	1712.21	1128.17	785.84	2879.9	1340.33	122.4	445.794	54.5588	69.7176	369.188					720.14	996.64	849.774	351.813	1108.22	331.03	924.484	815.974			732.185	513.391	432.084	475.927	1047.88	668.535	1072.49	726.636
21	1591.65	3733.71			405.12	1208.13	273.304	732.68	1935.79	1195.59	407.75	2976.09			173.366	499.648	67.3902	282.707					1126.84	604.427	1366.63	725.328	905.39	279.72	1455.72	1224.72			267.22	236.439	548.385	527.521	992.199	682.582	1170.43	729.761
22	1454.35	1320.02			316.78	687.87	205.918	713.503	1488.57	704.08	953.03	1550.2			628.204	474.019	1091.42	283.494					1256.63	416.741	1187.41	318.954	234.09	1716.45	1891.97	530.374			252.226	203.879	1247.29	1885.58	794.722	374.115	1097.6	1143.24
23	1868.53	529.949			255.98	703.68	213.568	632.368	1748.79	518.03	756.65	800.51			293.824	55.8824	232	522.803					1057.47	500.01	899.463	230.919	1784.81	972.81	2767.71	882.281					740.286	755.981	1407.98	1382.36	1935.43	1260.37
24	526.927	710.359			2943.51	925.05	153.612	781.534	978.48	1012.61	1033.41	588.3			197.694	63	373.896	523.779					918.122	819.751	1238.3	1588.46			1379.53	1208.8					821.188	1056.66	992.787	870.093	1043.53	705.31
25	1474.5	607.408			663.59	211.38	495.429	223.854	1324.85	1177.77	757.7	274.68			263.093	52.2897	268.511	367.967					922.081	449.303	980.382	755.043			1949.28	699.17					511.706	624.444	759.669	774.02	1044.15	905.929
26	447.227	887.286			246.32	1149.9	679.769	1452.67	748.77	960.2	887.23	2317.76			156.361	45.2639	288.376	176.471					1360.74	435.295	912.196	718.382			2068.92	1022.77					450.977	558.493	1439.02	1068.67	1865.07	1392.23
27	503.12	675.04			390.72	205.74	566.999	2643.88	1072.81	302.01	657.57	2780.24			235.535	54.6263	136.293	381.829					603.302	429.872	1379.85	1006.22			3002.38	683.875					702.227	862.615	2781.49	2047.03	1674.15	1202.67
28	358.166	853.256			190.53	968.68	397.806	621.458	1220.97	337.53	1690.99	661.75			42.448	717.8	372.656	623.459					1110.05	385.906	916.74	640.943			2304.58	858.254					1573.09	2410.96	1690.1	1176.17	1061.53	853.776
29	748.707	290.89			354.84	611.25	1077.11	807.873	1809.38	554.28					302.064	82.6923	225.073	345.073					1172.63	280.688	594.761	966.208			3991.26	1211.83					862.689	939.166	1095.88	630.064	857.966	556.923
30	413.196	1251.51			236.09	125.47	955.088	710.834	1491.05	409.79					916.915	238.465	341.45	92.625					781.09	423.415	759.804	370.088			3227.77	869.652					855.751	1053.64	2210.57	1578.98	966.96	700.838
31	801.141	2086.35			236.84	710.17	262.256	1126.37	754.03	1102.87							723.646	103.896					912.471	295.839	857.115	509.642			1735.54	675.008					532.05	660.964	762.821	581.184	1405.21	1422.58
32	435.414	668.355			696.49	1564.44			1502.5	1602.33							514.567	271.067					559.719	215.76	2144.3	477.894			3768.72	1756.29					504.842	661.252	723.549	568.192	1024.15	915.699
33	1226.77	2269.64			410.81	2014.08			823.21	1909.41							164.906	1826.21					1661.3	251.973					2259.04	588.872					610.088	573.969	1260.71	1204.65	791.835	803.41
34	3412.47	2977.45			252.8	365.5			858.44	502							134.304	1468.78					592.198	592.198					1808.56	254.226					540.102	676.121	1672.33	1393.34	633.991	324.553
35	2204.58	683.041			198.59	1189.06			1209.98	441.01							76.875	407.738					830.802	321.34					1848.63	274.266					428.605	724.238	1006.45	772.593	1982.65	1465.43
36	2889.17	2805.67			536.05	986.04			2228.02	557.38							158.745	265.157					463.505	458.723					2220.21	820.744					947.67	1242.48	988.834	669.583	2493.13	1905.09
37	1023.49	1894.9			276.8	1462.02			1297.83	1620.15							1196.63	192.038					370.141	317.54					2059.33	757.199					760.124	1052.19	2573.9	1798.56	1663.42	1181.46
38	1217.17	504.328			841.68	349.67			686.46	990.86							396.817	98.7073					1379.64	485.61					1439.78	317.594					720.457	1039.59	1285.2	808.437	1432.23	1360.27
39	3877.81	1459.19			382.81	2955.96			1590.89	1090.18							208.95	328.283					2548.67	439.556					2160.96	796.675					591.683	810.491	1056.28	524.89	2210.3	1635.52
40	1111.66	3100.32			318.45	1222.5																	1402.94	427.536					2490.37	590.925					563.298	581.014	1268.12	488.815	1738.87	1568.61
41	451.436	1132.84			448.76	872.29																	1063.86	421.344					1367.16	961.143					1040.55	1309.64	1348.39	969.717	2137.91	1619.5
42	605.772	1153.39			466.12	1201.17																	1727.32	560.483					3083.63	2878.78					1295.51	1854.02	1587.48	1376.16	3607.02	2318.69
43	394.198	2491.44			221.02	1234.79																	982.724	358.941					3921.1	627.067					1138.06	1483.5	1305.75	822.979	710.608	470.959
44	1820.58	1116.66			448.35	1386.45																							465.248	1116.5					858.138	891.981	949.333	733.601	1045.51	786.931
45	2114.53	1257.02			666.99	1291.43																							2694.71	856.404					1924.6	2551.87	2477.27	2007.85	874.34	595.443
46	477.029	1366.25			285.13	1872.85																							2238.04	782.007					1146.38	1390.16	695.666	531.653
47	369.171	931.721			397.44	144.27																													2838.87	3938.25	1120.02	707.187
48					380.67	1063.9																													2660.44	3771.81	1967.97	1608.22
49					376.29	758.24																													1401.65	1320.81	901.175	656.205
50					648.37	1415.81																													1678.2	1701.1
51					363.97	151.91																													1943.21	2588.61
52					308.15	677.49																													1147.6	1188.79
53					311.13	671.82																													1290.64	1496.43
54					312.43	734.65																													1712.36	1682.87
55					673.32	430.49																													1537	2044.47
56					180.8	506.34																													2000.25	2688
57					212.6	369.98																													1134.13	1052.72
58					360.68	1386.92																													1226.38	1091.93
59					520.31	200.42																													1386.78	2254.37
60					390.51	1042.34																													1012.49	1701.9
61					88.05	310.95																													1398.39	1469.38
62					123.96	468.75																													1243.46	2276.63
63					282.65	587.98
64					114.03	437.72
65					611.52	569.49
66					304.92	2776.81
67					475.94	526.48
