# Supplementary figures and images for: A multicellular way of life for a multipartite virus
Source: eLife journal article supplement (doi:10.7554/elife.43599), 2019-03-11

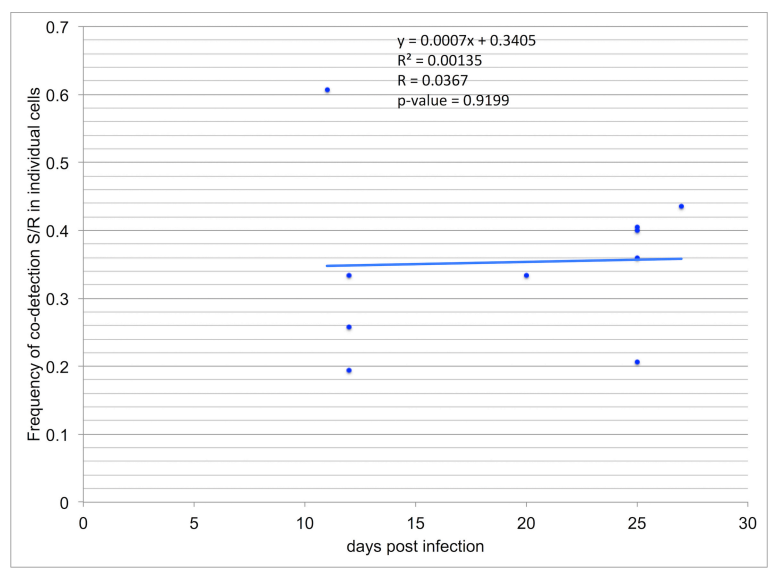

Supplement: supp [file elife-43599-supp-v1.zip]

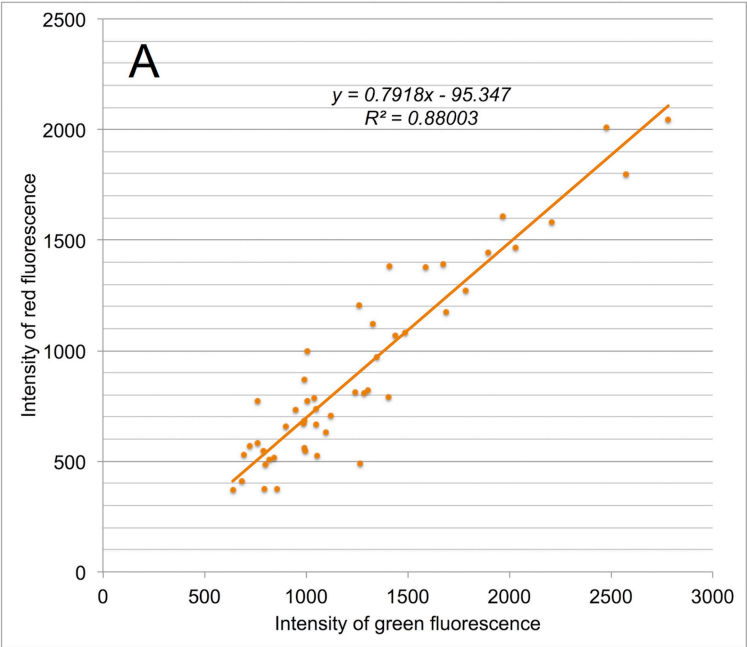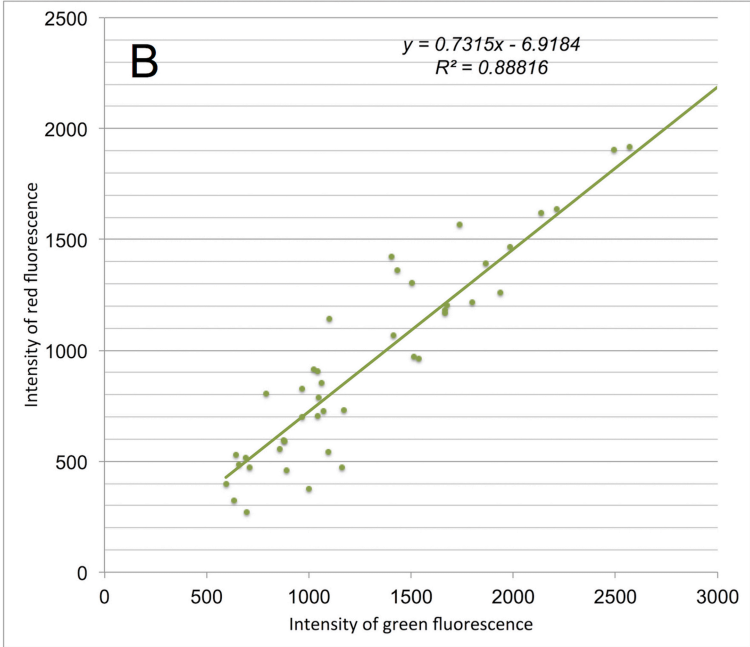

Supplement: supp [file elife-43599-supp-v1.zip]

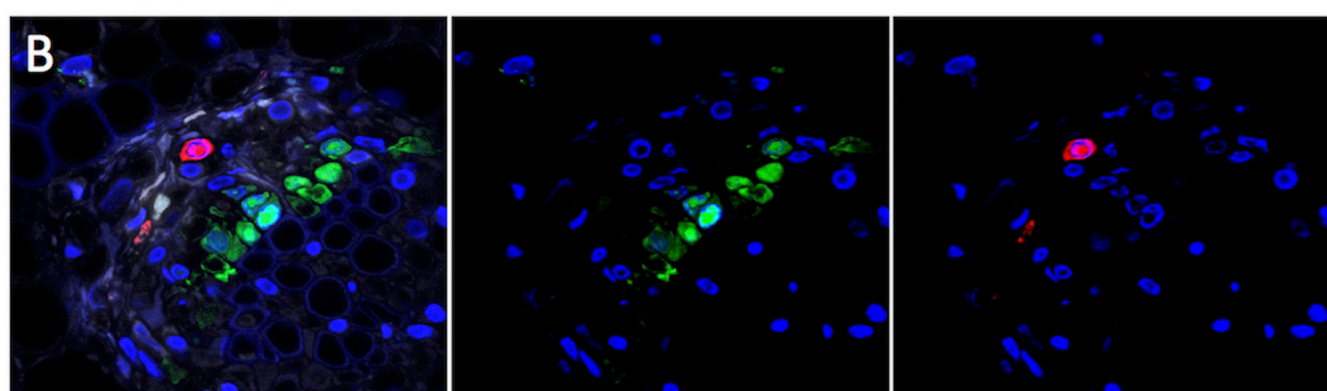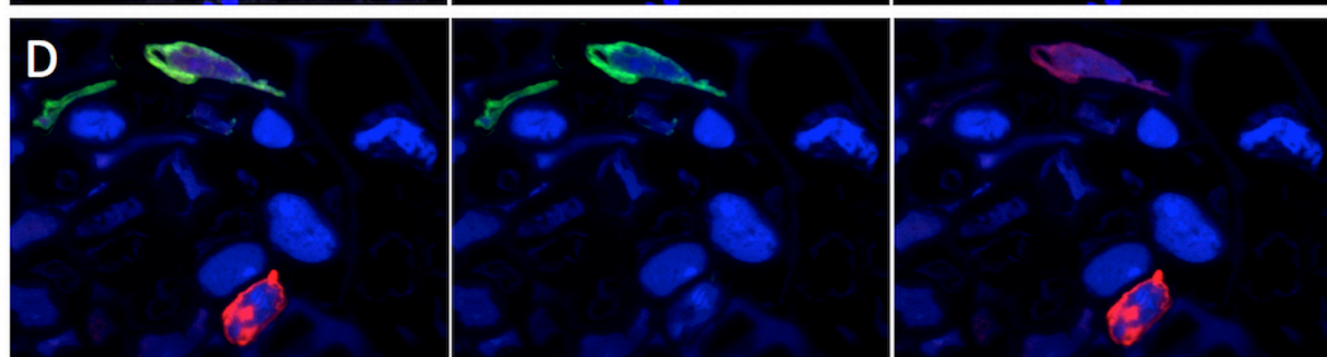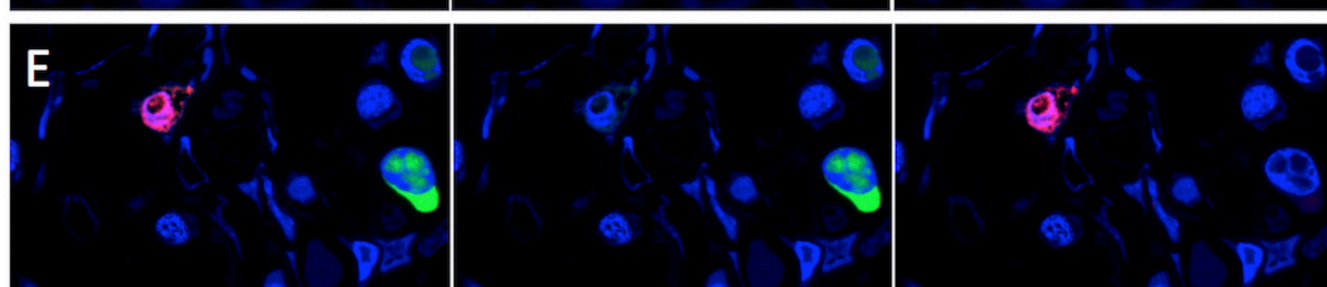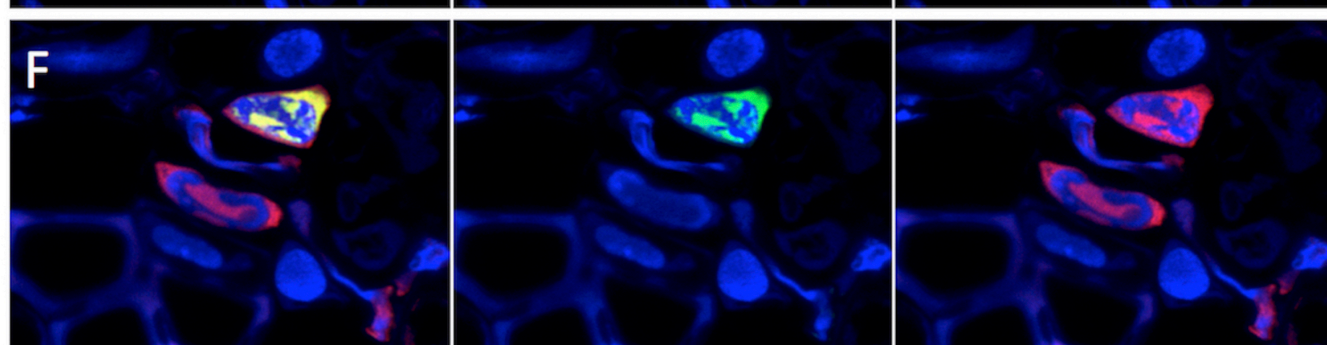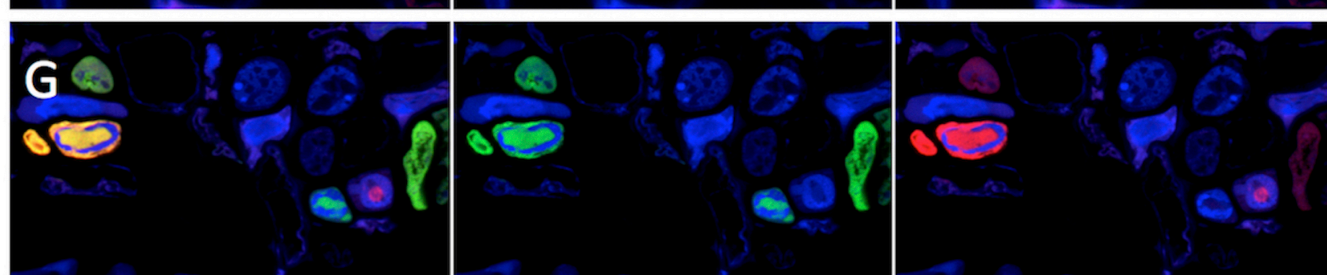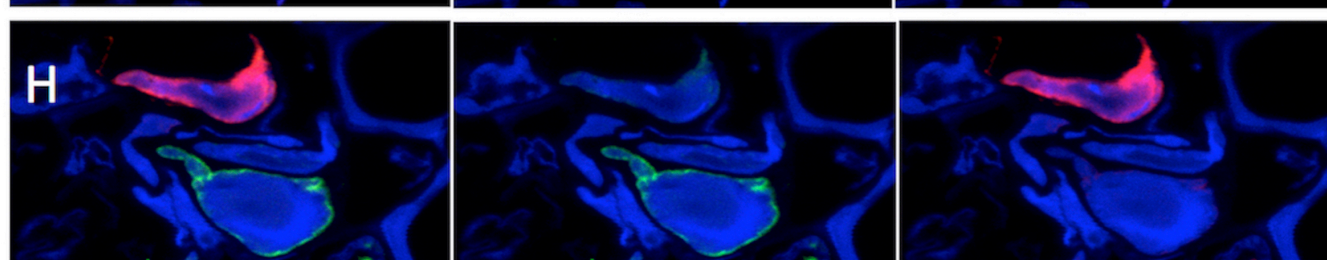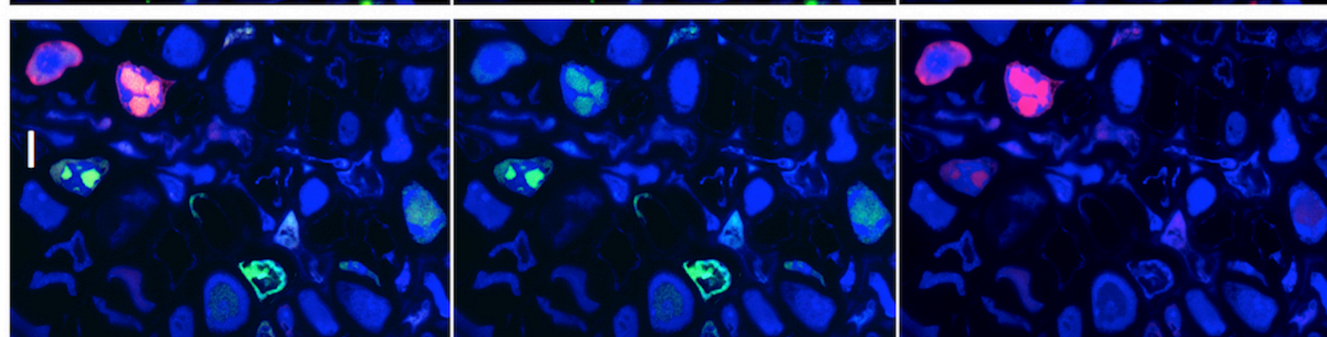

Supplement: supp [file elife-43599-supp-v1.zip]
